# Supplementary material
Source: MDPI journal article supplement (https://www.mdpi.com/2075-4442/11/8/329)
Supplement: s1 [file s1]

# Supplementary Material

The film thickness ratio ( $\lambda$ ) is used to estimate the lubrication regime under a specific lubrication system. In general, when  $\lambda > 3$ , the system is supposed to work in the hydrodynamic or elastohydrodynamic lubrication regime; when  $3 \geq \lambda \geq 1$ , the system works in the mixed lubrication regime; and when  $\lambda < 1$ , it is the boundary lubrication regime. The study is to investigate the tribological properties of PILs under a boundary lubrication regime, so the operating parameters in this research are well designed accordingly.

$$\lambda = \frac{h_{min}}{\sqrt{(R_1^2 + R_2^2)}}$$

In the formula up there,  $h_{min}$  is the minimum film thickness, and  $R_1$  and  $R_2$  are roughness of surfaces in contact. Regarding the elliptical contact, the following formulas that developed by Hamrock and Dowson have been used to calculate the minimum film thickness [1].

$$\frac{h_{min}}{R'} = 3.63U^{0.68}G^{0.49}W^{-0.073}(1 - e^{-0.68k})$$

$$U = \frac{\eta_0 u_0}{E'R'}$$

$$G = \alpha E'$$

$$W = \frac{F}{E'R'^2}$$

Among the parameters,  $R'$  is the effective radius,  $k$  is the ellipticity parameter,  $\eta_0$  is the lubricant dynamic viscosity at atmospheric pressure and certain temperature,  $u_0$  is the mean speed of the two contact surfaces,  $\alpha$  is the pressure-viscosity coefficient at a certain temperature, and  $F$  is the normal load.

**Table S1.** Lubrication regime estimation for each lubricant at aluminum-steel contacts.

| Lubricant | $U \times 10^{-11}$ | G      | W                     | $k$ | $h_{\min} \times 10^{-9}$ | $\lambda \times 10^{-3}$ | Lubrication Regime |
|-----------|---------------------|--------|-----------------------|-----|---------------------------|--------------------------|--------------------|
| BO        | 1.47                | 1096.5 | $7.30 \times 10^{-5}$ | 1   | 4.63                      | 8.6                      | Boundary           |
| BOA       | 1.49                | 1096.5 | $7.30 \times 10^{-5}$ | 1   | 4.68                      | 8.7                      | Boundary           |
| 1%Ets+BO  | 1.56                | 1096.5 | $7.30 \times 10^{-5}$ | 1   | 4.83                      | 9.0                      | Boundary           |
| 1%Mts+BO  | 1.55                | 1096.5 | $7.30 \times 10^{-5}$ | 1   | 4.80                      | 9.0                      | Boundary           |
| 1%Dts+BO  | 1.54                | 1096.5 | $7.30 \times 10^{-5}$ | 1   | 4.78                      | 8.9                      | Boundary           |
| 1%Eds+BO  | 1.70                | 1096.5 | $7.30 \times 10^{-5}$ | 1   | 5.13                      | 9.6                      | Boundary           |
| 1%Mds+BO  | 1.69                | 1096.5 | $7.30 \times 10^{-5}$ | 1   | 5.09                      | 9.5                      | Boundary           |
| 1%Dds+BO  | 1.92                | 1096.5 | $7.30 \times 10^{-5}$ | 1   | 5.56                      | 10.4                     | Boundary           |

1 Hamrock, B.J.; Dowson, D. Isothermal Elastohydrodynamic Lubrication of Point Contacts: Part III—Fully Flooded Results. *J. Lubr. Technol.* **1977**, *99*, 264–275. <https://doi.org/10.1115/1.3453074>.
